# Supplementary material for: A kinase-deficient NTRK2 splice variant predominates in glioma and amplifies several oncogenic signaling pathways
Source: PubMed Central journal article supplement (PMC7293284; doi:10.1038/s41467-020-16786-5), 2020-06-12
Supplement: 41467_2020_16786_MOESM1_ESM.pdf [file 41467_2020_16786_MOESM1_ESM.pdf]

A kinase-deficient *NTRK2* splice variant predominates in glioma and amplifies several oncogenic signaling pathways

Pattwell et al.

Supplementary Figures 1-9  
Supplementary Table 1

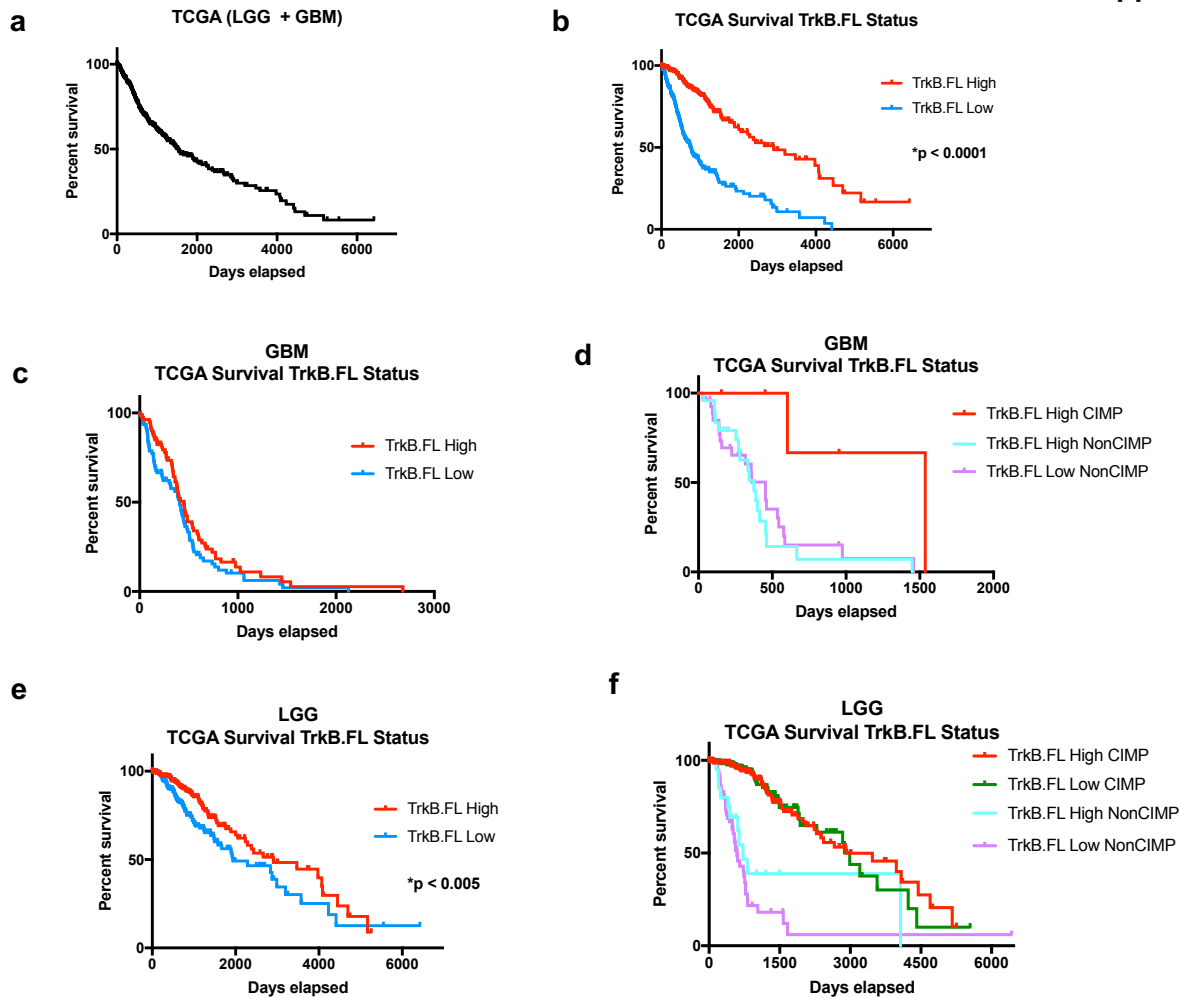

**Supplementary Fig. 1: Survival curves from The Cancer Genome Atlas (TCGA).** Survival curve for all TCGA low grade glioma (LGG) and glioblastoma multiforme (GBM) samples combined (**a**) compared to survival curve for all combined TCGA samples divided by TrkB.FL status (**b**) shows that higher TrkB.FL expression does *not* correlate with worse survival and correlates with *longer* survival (above median = TrkB.FL high; below median = TrkB.FL low; 2907 days vs 758 days (log rank hazard ratio 0.2827, 95% confidence interval 0.2195-0.3641,  $p < 0.0001$ )). When stratified by tumor type, there is a trend for TrkB.FL status to correlate with longer survival in GBM (448 days vs 408 days) but this is not statistically significant (**c,d**). There is a significant effect of TrkB.FL status on survival in LGG where high TrkB.FL corresponds with longer survival (**e, f**) 2907 days vs 1933 days (log rank hazard ratio 0.6281, 95% confidence interval 0.4411-0.8945,  $p < 0.005$ ).

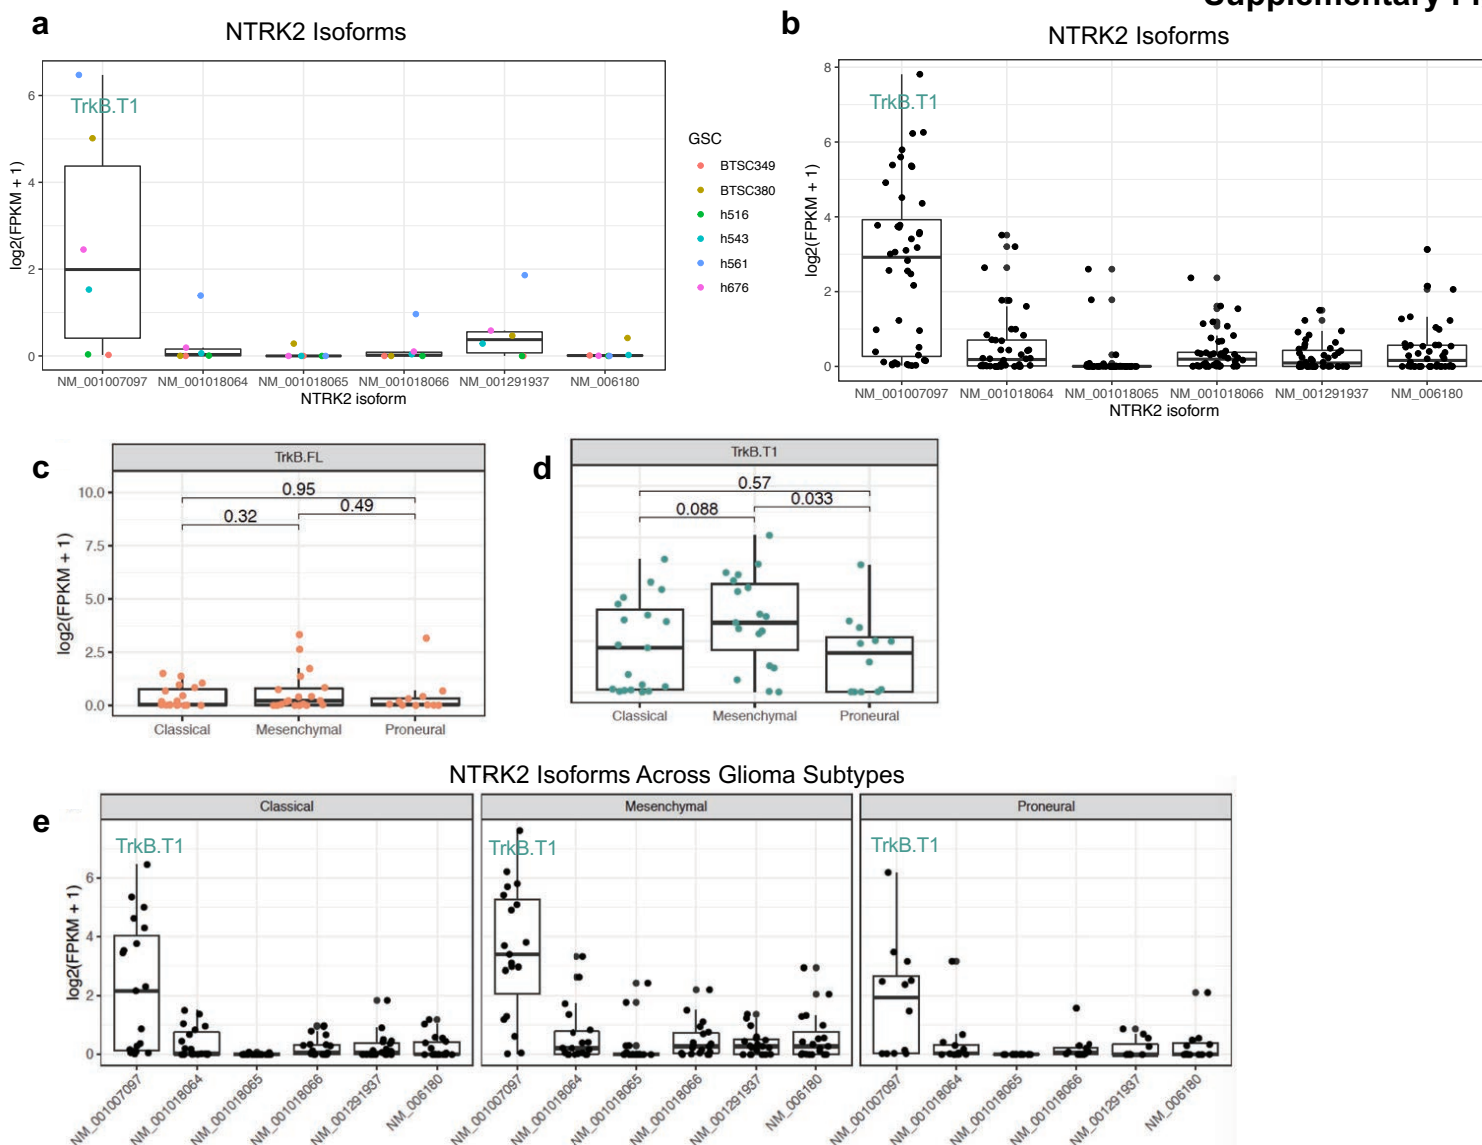

**Supplementary Fig. 2: NTRK2 Transcript Analysis shows TrkB.T1 to be the most predominant NTRK2 isoform across a large sample of human glioblastoma stem cell (GSC) lines.** TrkB.T1 is the predominant NTRK2 isoform expressed in 6 in house GSCs lines (BTSC349, BTSC349, h543, h516, h561 and h676) (**a**) and in 44 additional GSC lines derived from primary tumors<sup>1</sup> (**b**). TrkB.FL expression remains low across all GSC subtypes while TrkB.T1 expression is increased compared to other NTRK2 variants across GSC subtypes (50 total GSC lines) (**c**, **d**, **e**). Data shown in (**c**) contains p-values for t-tests, two-sided. Data are represented as boxplots (**a** - **e**), where the middle line is the median, the lower and upper hinges correspond to the first and third quartiles (the 25th and 75th percentiles), the upper whisker extends from the hinge to the largest value no further than  $1.5 \times \text{IQR}$  from the hinge (where IQR is the inter-quartile range, or distance between the first and third quartiles) and the lower whisker extends from the hinge to the smallest value at most  $1.5 \times \text{IQR}$  of the hinge while data beyond the end of the whiskers are outlying points that are plotted individually<sup>2</sup>.

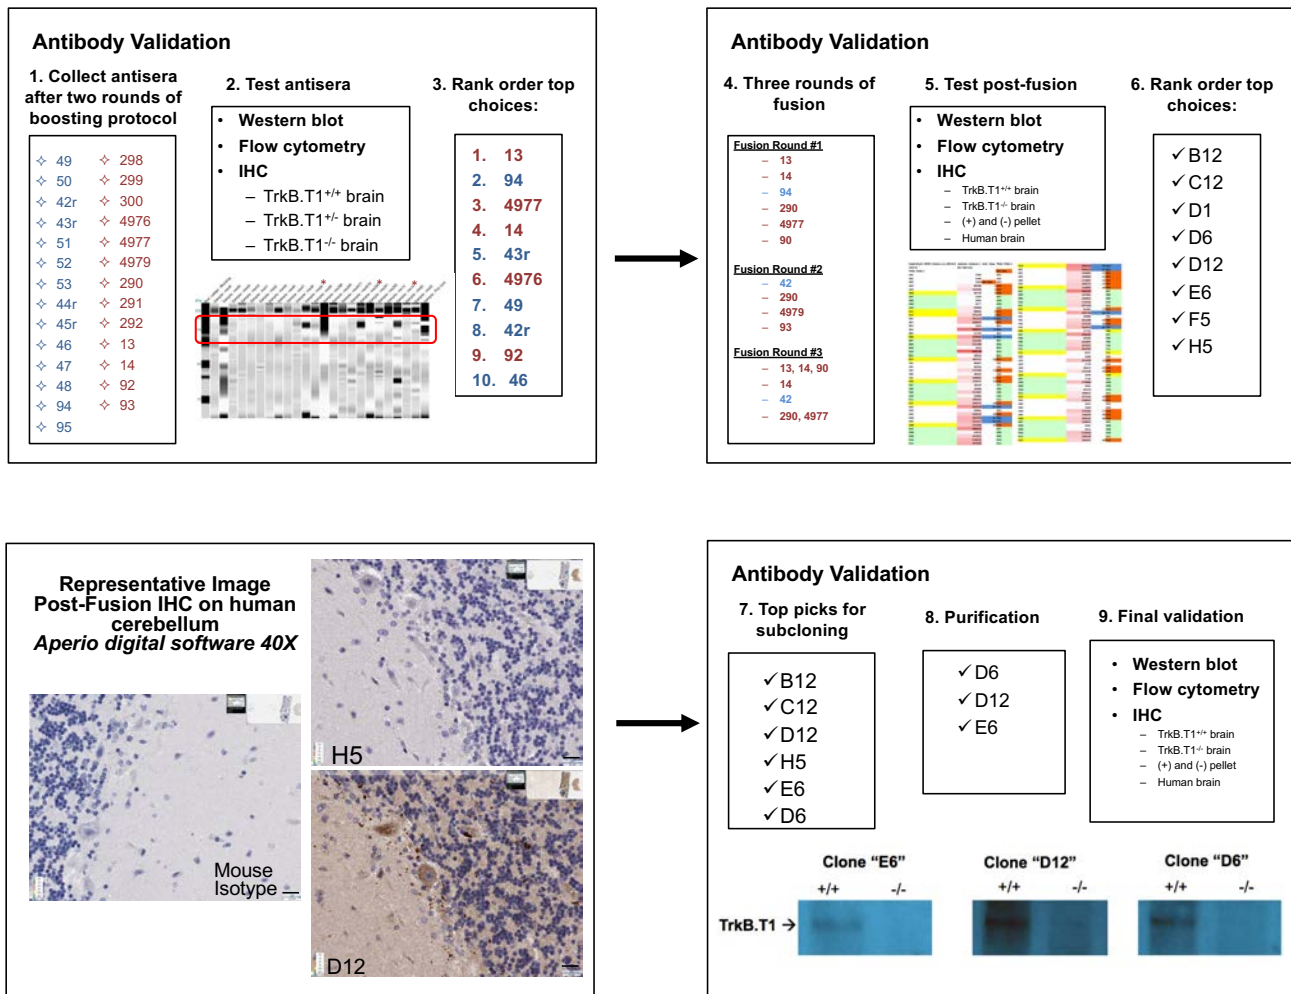

**Supplementary Fig. 3: Summary of antibody validation process.** Mice used for TrkB.T1-specific antibody development included standard CD1, BALBC, A/J mice (mouse IDs shown in blue) and TrkB.T1<sup>-/-</sup> mice (mouse IDs shown in red). Prior to fusion, antisera from each mouse was tested for positive staining in immunohistochemistry on TrkB.T1<sup>+/+</sup> wild-type mouse brain, TrkB.T1<sup>+/-</sup> mouse brain, and TrkB.T1<sup>-/-</sup> mouse brain and normal human brain. Clone selection protocol and representative image of positive western blots during antibody development using WES system. WES blots were confirmed with western blotting using Life Tech XCell SureLock™ Mini-Cell electrophoresis system using wild-type mouse brain and TrkB.T1<sup>-/-</sup> brain. Western blots were performed in duplicate using technical replicates of each clone on biologically independent samples, and representative images were chosen, TrkB.T1 band at 95 kDa. Aperio 40X scale bars = 25 μm.

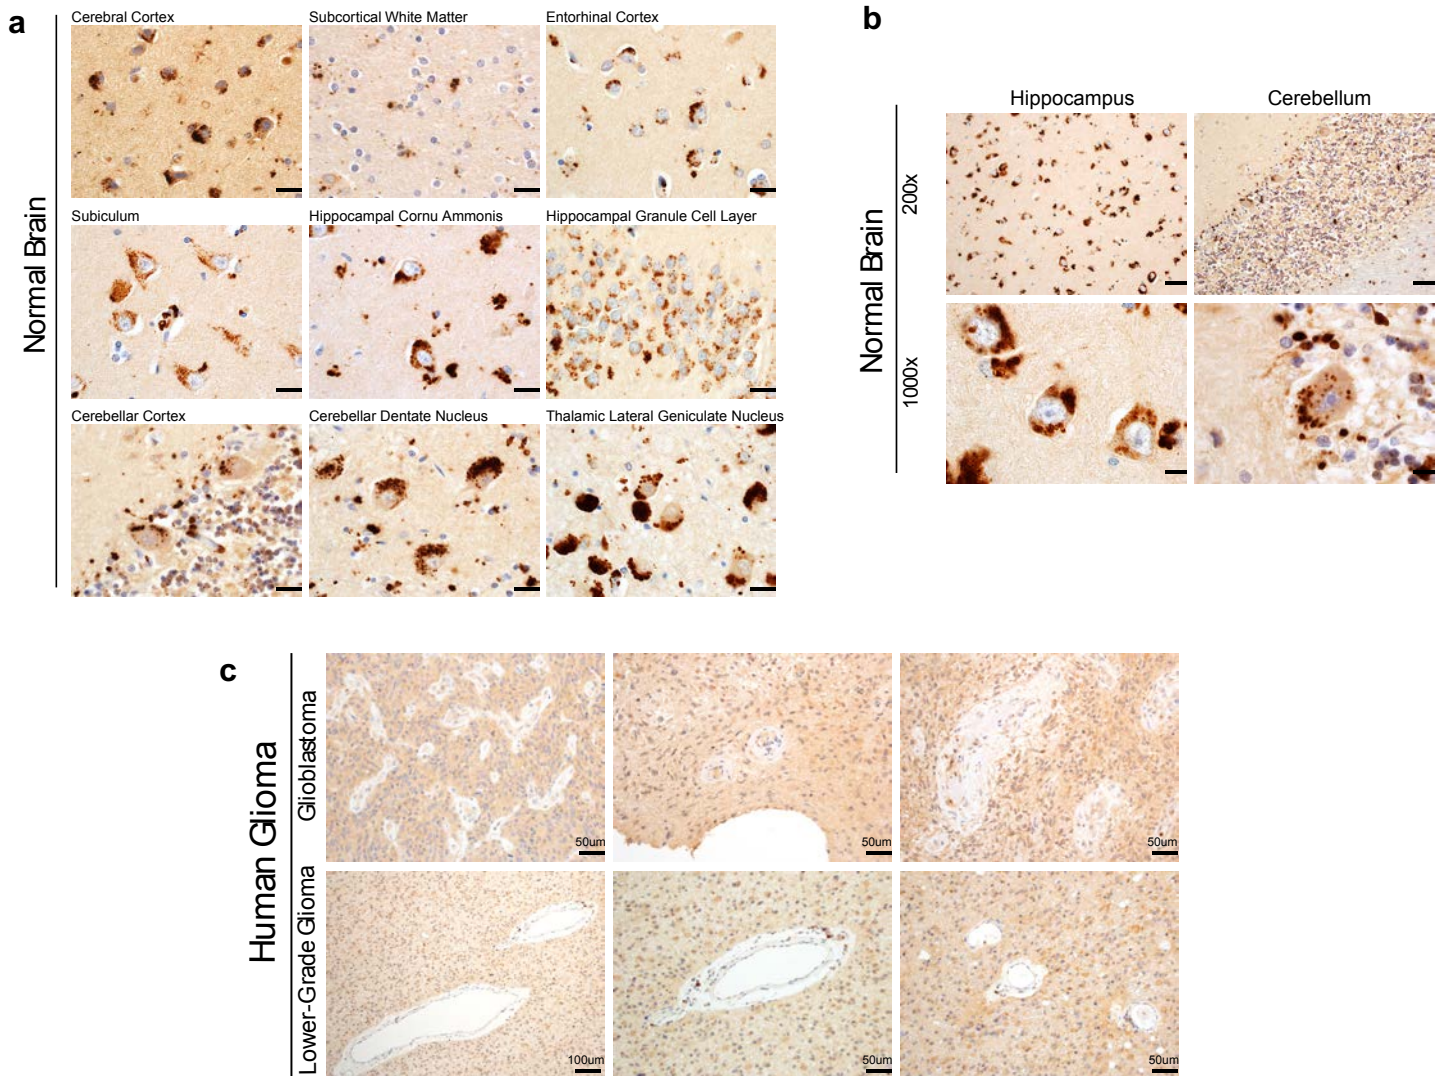

**Supplementary Fig. 4: TrkB.T1 immunostaining in normal human brain and glioma. (a)** Immunohistochemical staining demonstrating regional distribution of TrkB.T1 in normal human brain regions with punctate, vesicular pattern. Photomicrographs are at 400-600X. **(b)** Regional distribution of TrkB.T1 in normal hippocampus and cerebellum shows punctate, vesicular pattern at higher magnification. Photomicrographs are as specified at both 200X (scale bar = 50  $\mu$ m) and 1000X (scale bar = 10  $\mu$ m) to highlight punctate, vesicular pattern. **(c)** TrkB.T1 immunostaining of GBM and diffuse gliomas shows diffuse positive stain throughout tumor and negative staining in blood vessels. Photomicrographs are at 10-20X (scale bars individually labeled). Immunohistochemistry was performed on independent biological samples of each brain region and tumor type, in replicates of 3-5. Representative images were chosen and additional images are shown in Fig.4.

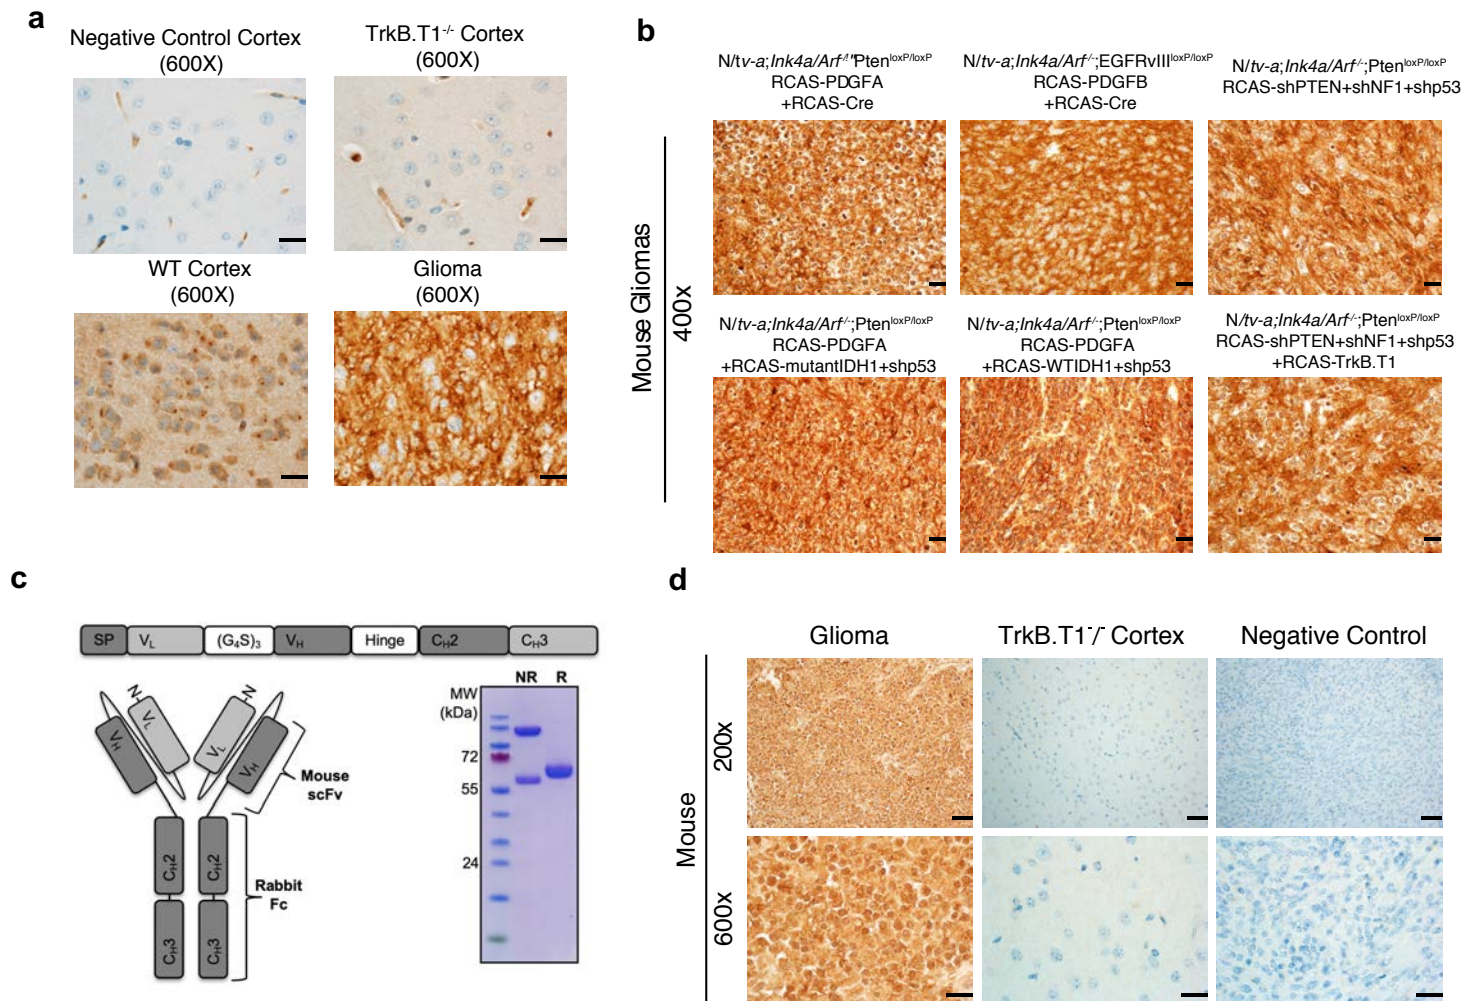

**Supplementary Fig. 5: TrkB.T1 immunostaining in mouse gliomas and TrkB.T1 recombinant rabbit antibody.** (a) TrkB.T1 immunostaining of normal mouse cortex shows comparable staining in the negative (no primary antibody) control and TrkB.T1<sup>-/-</sup> cortex, punctate/vesicular staining normal wild-type (WT) mouse cortex and strong/diffuse staining in tumor. Immunostaining of various RCAS-driven mouse gliomas shows positive staining in tumor regardless of genetic background or RCAS-injection combination (b). Schematic showing the domain architecture of the SPEH1\_D12 scFv-Fc fusion protein and sodium dodecyl sulfate polyacrylamide gel showing the purified recombinant protein expressed in mammalian cells under non-reducing and reducing conditions (c). TrkB.T1 immunostaining in mouse gliomas using recombinant TrkB.T1 fusion protein with rabbit secondary antibodies recapitulates staining patterns using TrkB.T1 mouse antibody, shown in (a) (and Fig. 4 and Fig. Supplementary Fig. 4), showing diffuse staining in mouse tumor with a lack of staining in rodent TrkB.T1<sup>-/-</sup> cortex and negative control (no primary antibody) (d). Photomicrographs are as specified at 200X (scale bar = 50  $\mu$ m), 400X (scale bar = 20  $\mu$ m), 600X (scale bar = 20  $\mu$ m). Immunohistochemistry was performed on independent biological samples of each brain region and tumor type, in replicates of 3-5. Representative images were chosen and additional images are shown in Fig.4.

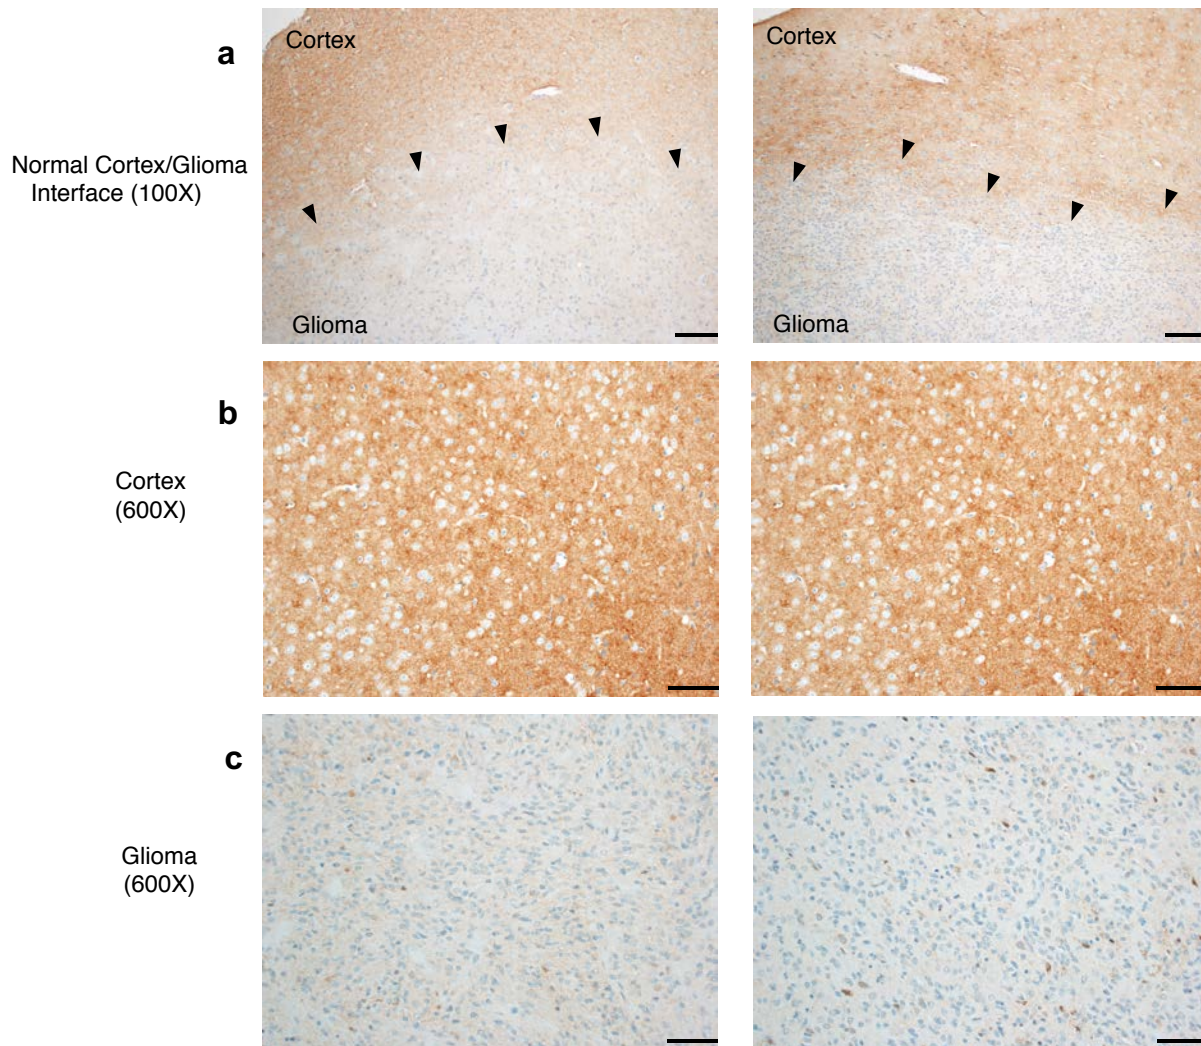

**Supplementary Fig. 6: Immunostaining of TrkB.FL.** Immunostaining with an antibody designed against the TrkB kinase (which therefore detects TrkB.FL, but not TrkB.T1), shows contrasting patterns to TrkB.T1 staining shown in **Fig. 4** and **Supplementary Fig. 4, Supplementary Fig. 5**. TrkB.FL staining is strong in the normal cortex and virtually absent in tumor (**a,b,c**). Photomicrographs are as specified at 100X (scale bar = 100  $\mu\text{m}$ ) and 600X (scale bar = 20  $\mu\text{m}$ ). Immunohistochemistry was performed on independent biological samples of each normal brain/tumor interface, in replicates of 3-5.

## Supplementary Fig. 7

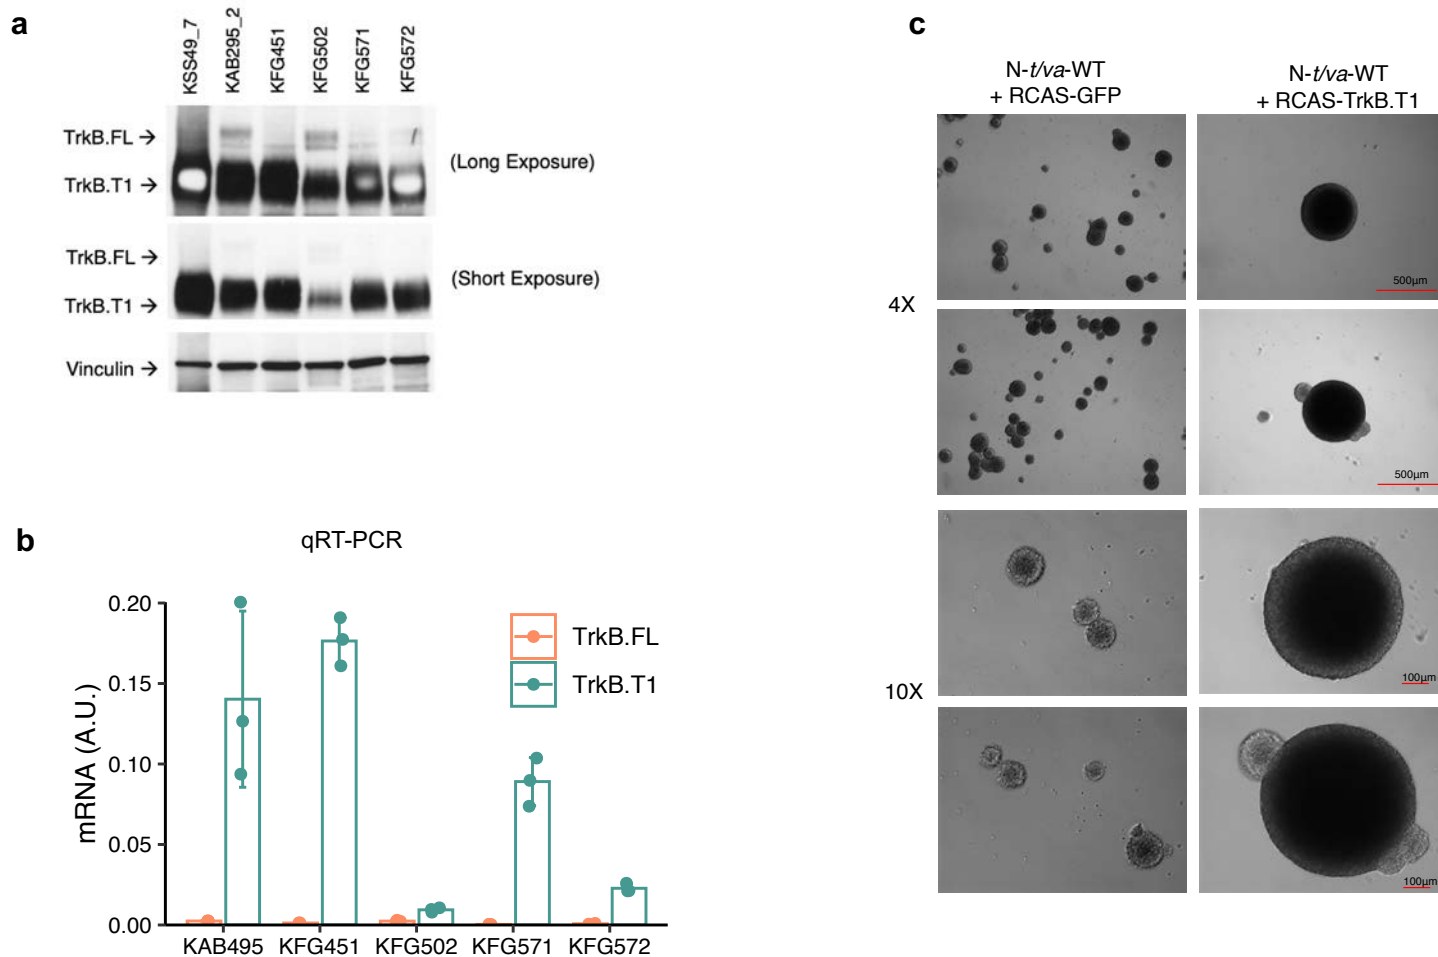

**Supplementary Fig. 7: Mouse tumorspheres show increased TrkB.T1 expression and RCAS-TrkB.T1 enhances nestin/*tv-a* primary mouse neurosphere diameter.** (a) Mouse tumorsphere lines show a predominance of TrkB.T1 (95 kDa) compared to TrkB.FL (145 kDa) via western blot (KSS49\_7: wildtype; KAB295\_2: wildtype; KFG451: PDGFB + sgRNA PTEN; KFG502: PDGFB + sgRNA p53; KFG571: PDGFB + sgRNA CDKN2a; KFG572: PDGFB + sgRNA CDKN2a) and (b) qRT-PCR (cell lines analyzed in triplicate;  $n = 3$  per cell type; error bars represent standard deviation). Western blotting was performed on triplicate samples and representative images were chosen with vinculin loading control (124 kDa). qRT-PCR bars for TrkB.T1 shown in teal, qRT-PCR bars TrkB.FL shown in orange. (c) Representative images of neural stem cells isolated from subventricular zone of nestin/*tv-a* wild-type postnatal day 1 (P1) pups were infected with RCAS-GFP or RCAS-TrkB.T1 and allowed to form neurospheres. Images taken at 4X (scale bar = 500  $\mu\text{m}$ ) and 10X (scale bar = 100  $\mu\text{m}$ ), as indicated, demonstrate enhanced neurosphere diameter in RCAS-TrkB.T1 spheres, consistent with previous findings<sup>3</sup>.



## Supplementary Fig. 8

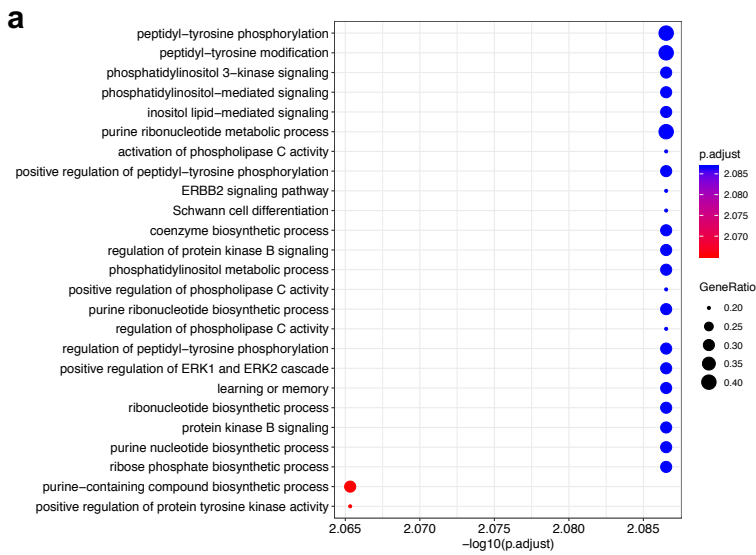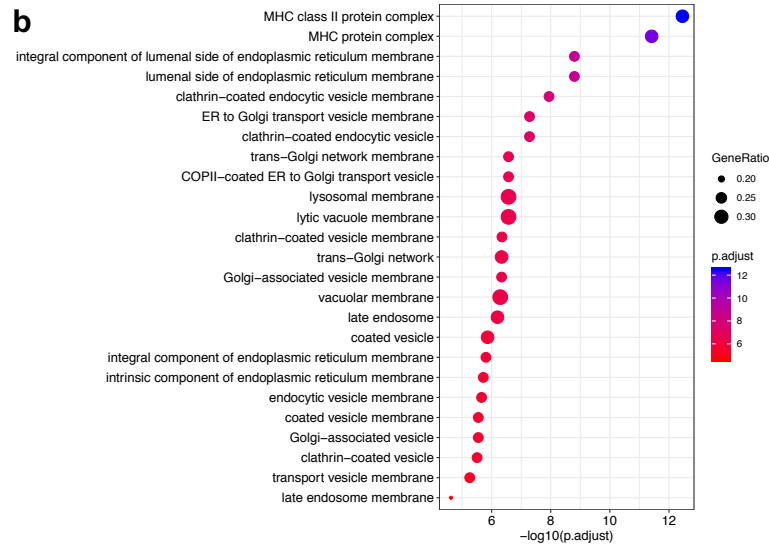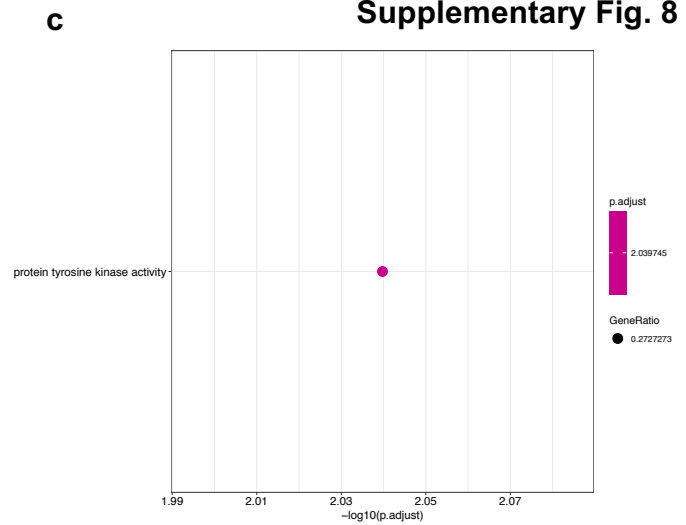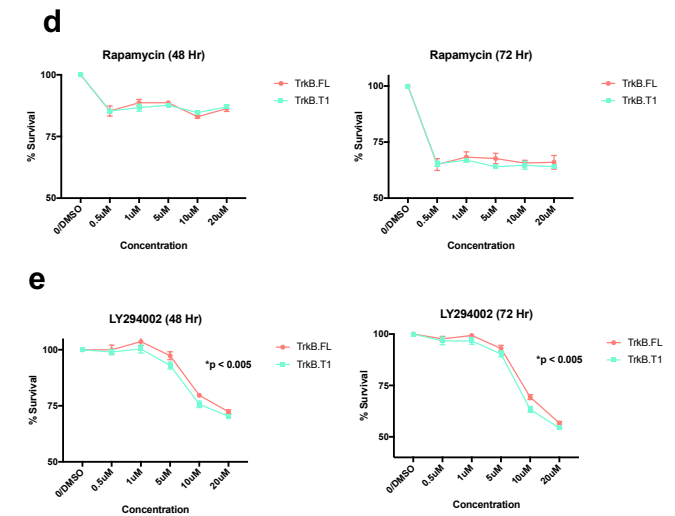

**Supplementary Fig. 8: TrkB.T1 upregulates genes involved in PI3K/Akt signaling and downregulates genes associated with clathrin coated vesicles and endosomes in human neural stem cells (NSCs) and TrkB.T1 NSCs are more sensitive to PI3K inhibitor LY294002.** (a) Biological process GO terms for genes upregulated in TrkB.T1 transduced NSCs compared to TrkB.FL transduced NSCs revealed genes involved in PI3K/Akt pathway, ERBB2, and endosomal compartments. (b) Cellular compartment GO terms revealed a host of downregulated genes in clathrin-coated vesicles and endosomes while (c) molecular process terms showed upregulated protein kinase activation genes in TrkB.T1 transduced NSCs compared to TrkB.FL-transduced NSCs. Treatment with rapamycin yielded similar dose-dependent results in both TrkB.T1 and TrkB.FL transduced NSCs at both 48 and 72 hours (d), while TrkB.T1 transduced NSCs were significantly more sensitive to LY294002 than TrkB.FL transduced NSCs in a dose dependent manner at 48 hours ( $F(1,24) = 10.03$ ;  $p=0.0042$ ) and at 72 hours ( $F(1,24) = 12.91$ ;  $p=0.0015$ ) (e). For rapamycin drug studies,  $n = 3$  plates of TrkB.T1-transduced NSCs, 3 plates of TrkB.FL-transduced cells, for each time point (3 plates of each condition for 48 hrs, 3 plates of each condition for 72 hrs). For LY294002 drug studies,  $n = 3$  plates of TrkB.T1-transduced NSCs, 3 plates of TrkB.FL-transduced cells, for each time point (3 plates of each condition for 48 hrs, 3 plates of each condition for 72 hrs). TrkB.T1-transduced NSCs shown in teal, TrkB.FL-transduced NSCs shown in orange.

### Supplementary Fig. 9

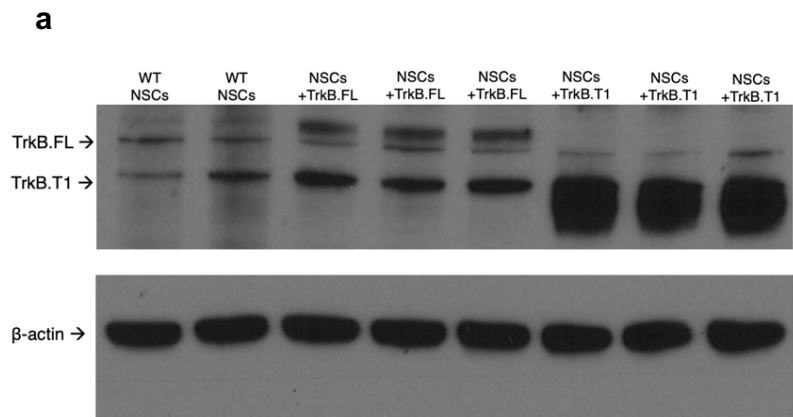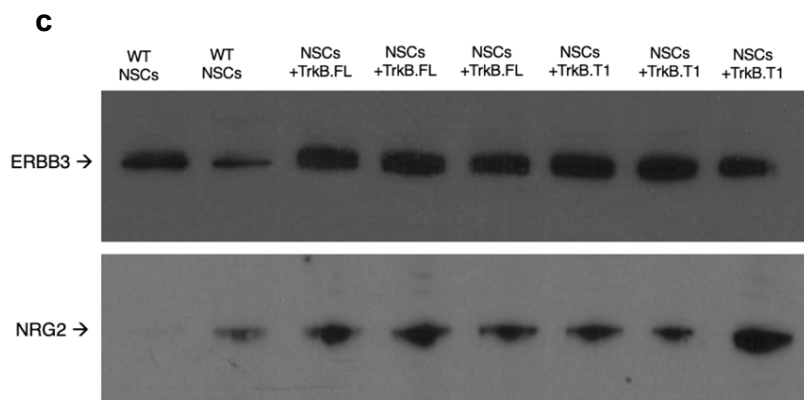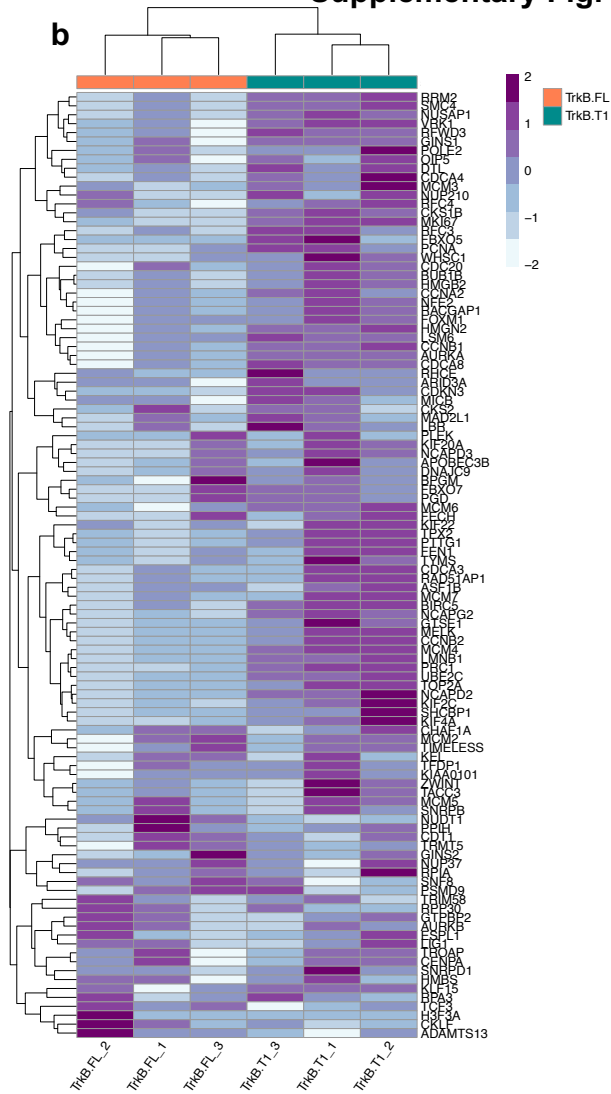

**Supplementary Fig. 9: NSC RNA Seq validation by protein analysis. (a)** Western blots for TrkB show that (corresponding to RNA Seq data in **Fig. 5.** and **Supplementary Datasheet 6**), TrkB.FL protein (145 kDa) levels are increased in pLJM1-TrkB.FL transduced NSCs while TrkB.T1 protein (95 kDa) levels are increased in pLJM1-TrkB.T1 transduced NSCs, compared to the endogenous expression of either isoform in NSCs. **(b)** TrkB.T1 transduced NSCs show increases in genesets previously characterized as makers of a cell's proliferative index <sup>4,5</sup>. **(c)** Western blot shows increased expression of ERBB3 (185 kDa) and ligand NRG2 (92 kDa) protein compared to endogenous NSC expression for these proteins. TrkB.T1-transduced NSCs shown in teal, TrkB.FL-transduced NSCs shown in orange. Western blotting was performed in duplicate and triplicate, on biologically independent samples, and representative images were chosen.

## Supplementary References

1. Mack, S.C. *et al.* Chromatin landscapes reveal developmentally encoded transcriptional states that define human glioblastoma. *J Exp Med* **216**, 1071-1090 (2019).
2. Hadley, W. *Ggplot2*, pages cm (Springer Science+Business Media, LLC, New York, NY, 2016).
3. Tervonen, T.A. *et al.* Overexpression of a truncated TrkB isoform increases the proliferation of neural progenitors. *Eur J Neurosci* **24**, 1277-85 (2006).
4. Ramaker, R.C. *et al.* RNA sequencing-based cell proliferation analysis across 19 cancers identifies a subset of proliferation-informative cancers with a common survival signature. *Oncotarget* **8**, 38668-38681 (2017).
5. Venet, D., Dumont, J.E. & Detours, V. Most random gene expression signatures are significantly associated with breast cancer outcome. *PLoS Comput Biol* **7**, e1002240 (2011).

Supplementary Table 1. Commercially available TrkB antibodies.

| Commercial vendor | Catalog #     | Host Species                          | Reactivity                                                                                           | Immunogen                                                                                                                                                             | Suggested Application |
|-------------------|---------------|---------------------------------------|------------------------------------------------------------------------------------------------------|-----------------------------------------------------------------------------------------------------------------------------------------------------------------------|-----------------------|
| Abcam             | ab33655       | Rabbit                                | Mouse, Rat, Human                                                                                    | The entire extracellular domain (corresponding to residues 1 to 429) of rat TrkB.                                                                                     | WB, IP, ICC/IF, IHC-P |
| Abcam             | ab18987       | Rabbit                                | Mouse, Rat, Chicken, Human                                                                           | Synthetic peptide corresponding to Human TrkB. Surrounding amino acid 810 of human TrkB. (Peptide available as ab52216)                                               | WB, IP, ICC/IF, IHC-P |
| Abcam             | ab134155      | Rabbit monoclonal [EPR1294] TrkB      | Human                                                                                                | Synthetic peptide (the amino acid sequence is considered to be commercially sensitive) (internal sequence)<br>*WB detects various isoforms                            | WB, IHC-P, IP         |
| Abcam             | ab187041      | Rabbit monoclonal [EPR17805-146] TrkB | Mouse, Rat                                                                                           | Recombinant fragment within Mouse TrkB aa 100-450. The exact sequence is proprietary.                                                                                 | WB, IP, IHC-P         |
| Abcam             | ab6180        | Rabbit                                | Rat, Human                                                                                           | Synthetic peptide corresponding to Rat TrkB aa 23-36 (extracellular) conjugated to Keyhole Limpet Haemocyanin (KLH) (Glutaraldehyde).<br>Sequence:<br>AFPRLEPNSIDPENC | IHC-P, ICC/IF, IHC-Fr |
| Abcam             | ab89925       | Mouse monoclonal [MM0586-7Y6] TrkB    | Human                                                                                                | Human TrkB recombinant protein                                                                                                                                        | WB                    |
| Abcam             | ab43079       | Rabbit                                | Mouse, Rat                                                                                           | Extracellular domain of Mouse TrkB.                                                                                                                                   | ELISA, IHC-Fr         |
| Abnova            | H00004915-M02 | Mouse                                 | Human                                                                                                | NTRK2 (AAH31835, 1 a.a. ~ 477 a.a) full-length recombinant protein with GST tag.                                                                                      | WB, ELISA             |
| Cell Signaling    | 4607          | Rabbit TrkB (80G2)                    | Human, 100% predicted with Mouse, Rat                                                                | Synthetic peptide surrounding Pro50 of human TrkB.                                                                                                                    | IHC, F                |
| Cell Signaling    | 4603          | Rabbit TrkB (80E3)                    | Human, Rat, Mouse                                                                                    | Synthetic peptide surrounding Pro50 of human TrkB.                                                                                                                    | WB                    |
| Cell Signaling    | 4606          | Rabbit                                | Human                                                                                                | Synthetic peptide corresponding to human TrkN                                                                                                                         | WB                    |
| EMD Millipore     | AB9872        | Rabbit                                | Mouse, rat                                                                                           | Extracellular domain of recombinant mouse receptor expressed in mammalian cells                                                                                       | IHC                   |
| EMD Millipore     | AB07-225      | Rabbit                                | Mouse, rat<br>Immunizing sequence has 97% identity with mouse TrkB and 88% identity with human TrkB. | The entire extracellular domain (corresponding to residues 1-429) of the rat TrkB receptor, expressed in COS cells.                                                   | WB                    |
| EMD Millipore     | AB5372        | Rabbit                                | Human, rat                                                                                           | Amino acids 54-67 of rtrkB                                                                                                                                            | WB, IHC               |

Supplementary Table 1. Commercially available TrkB antibodies.

|             |           |                                                                           |                                                                                                                                                                                                                                                                                                      |                                                                                                                   |                              |
|-------------|-----------|---------------------------------------------------------------------------|------------------------------------------------------------------------------------------------------------------------------------------------------------------------------------------------------------------------------------------------------------------------------------------------------|-------------------------------------------------------------------------------------------------------------------|------------------------------|
| R&D         | MAB397    | Mouse monoclonal IgG <sub>2B</sub> Clone # 75133                          | Human                                                                                                                                                                                                                                                                                                | Mouse myeloma cell line NS0-derived recombinant human TrkB Cys32-His430                                           | ELISA, WB                    |
| R&D         | AF1494    | Goat                                                                      | Mouse                                                                                                                                                                                                                                                                                                | Mouse myeloma cell line NS0-derived recombinant mouse TrkB Cys32-His429                                           | WB, ELISA                    |
| R&D         | MAB3971   | Mouse monoclonal IgG <sub>1</sub> Clone # 72509                           | Human                                                                                                                                                                                                                                                                                                | Mouse myeloma cell line NS0-derived recombinant human TrkB Cys32-His430                                           | WB, ELISA                    |
| R&D         | AF397     | Goat                                                                      | Human                                                                                                                                                                                                                                                                                                | Mouse myeloma cell line NS0-derived recombinant human TrkB                                                        | WB, ELISA                    |
| Santa Cruz  | sc-8316   | Rabbit polyclonal IgG TrkB (H-181)                                        | Recommended for detection of Trk B splice variants L1 and L10 of mouse origin, Trk B gp95 and Trk B gp145 of rat origin and Trk B, Trk B-T1 and Trk B T-Shc of human origin by WB, IP, IF, IHC(P) and ELISA; also reactive with additional species, including and equine, canine, bovine and porcine | Epitope corresponding to amino acids 160-340 mapping within the extracellular domain of Trk B of human origin     | IHC-P, WB, IP, IF, ELISA     |
| Santa Cruz  | sc-12     | Rabbit polyclonal IgG TrkB (794)                                          | Recommended for detection of the Trk B splice variants L1 and L10 of mouse origin, Trk B gp145 of rat origin and Trk B of human origin; also reactive with additional species, including and equine, canine and porcine                                                                              | Epitope mapping within a C-terminal cytoplasmic domain of Trk B of mouse origin                                   | WB, IP, IF, IHC-P and ELISA  |
| Santa Cruz  | sc-20542  | Goat polyclonal IgG Trk B (N-20)                                          | Recommended for detection of Trk B splice variants L1 and L10 of mouse origin, Trk B gp95 and Trk B gp145 of rat origin and Trk B, Trk B-T1 and Trk B T-Shc of human origin by; also reactive with additional species, including canine                                                              | Epitope mapping within an extracellular domain of Trk B of human origin                                           | WB, IP, IF and ELISA         |
| Santa Cruz  | sc-7268   | Mouse monoclonal IgG <sub>2a</sub> Kappa light chain Trk (B-3)            | Recommended for detection of Trk A, Trk B and Trk C of mouse, rat and human origin; also reactive with additional species, including and bovine and porcine                                                                                                                                          | Specific for an epitope mapping between amino acids 783-796 at the C-terminus of Trk of human origin              | WB, IP, IF, IHC-P and ELISA; |
| Santa Cruz* | sc-119    | Rabbit polyclonal IgG TrkB (C-13)                                         | Recommended for detection of Trk B splice variants L1 and L10 of mouse origin, Trk B gp95 of mouse and rat origin and Trk B-T1 of human origin, also reactive with additional species, including and equine, canine, bovine, porcine and avian                                                       | Epitope mapping at the C-terminus of TrkB of mouse origin                                                         | WB, IP, IF and ELISA;        |
| Santa Cruz  | sc-377218 | TrkB Antibody (F-1) is a mouse monoclonal mouse IgM κ (kappa light chain) | Recommended for detection of TrkB, TrkB-T1 and TrkBT-Shc of human origin; Trk B splice variants L1 and L10 of mouse origin; and Trk B gp95 and Trk B gp145 of rat origin                                                                                                                             | Specific for an epitope mapping between amino acids 37-75 within an extracellular domain of Trk B of human origin | WB, IP, IF, IHC-P and ELISA  |

Supplementary Table 1. Commercially available TrkB antibodies.

|                         |           |                                                                   |                                                                                                                                                                                           |                                                                                                |                             |
|-------------------------|-----------|-------------------------------------------------------------------|-------------------------------------------------------------------------------------------------------------------------------------------------------------------------------------------|------------------------------------------------------------------------------------------------|-----------------------------|
| Santa Cruz              | sc-139    | Rabbit polyclonal IgG Trk Antibody (C-15)                         | Recommended for detection of Trk A, Trk B and Trk C of mouse, rat, human and avian origin; also reactive with additional species, including and equine, canine, bovine, porcine and avian | Epitope mapping at the C-terminus of Trk of porcine origin                                     | WB, IP, IF, IHC-P and ELISA |
| Santa Cruz              | sc-136991 | Mouse Monoclonal IgG <sub>1</sub> (kappa light chain) TrkB (G-11) | Human                                                                                                                                                                                     | Raised against amino acids 209-298 of Trk B of human origin                                    | WB, IP, IF and ELISA        |
| ThermoFisher/Invitrogen | OST00118G | Sheep                                                             | Mouse, Rat                                                                                                                                                                                | Synthetic peptide corresponding to extracellular domain of Mouse TrkB.                         | WB, IHC                     |
| ThermoFisher/Invitrogen | PA1-24831 | Goat                                                              | Human                                                                                                                                                                                     | Recombinant, full length human protein expressed in NSO cells.                                 | ELISA, WB                   |
| ThermoFisher/Invitrogen | PA1-18402 | Rabbit                                                            | Human, Rat                                                                                                                                                                                | Synthetic peptide corresponding to residues A(23) F P R L E P N S I D P E N C(36) of rat TrkB. | IHC                         |
| ThermoFisher/Invitrogen | PA1-18403 | Rabbit                                                            | Mouse, Rat                                                                                                                                                                                | Extracellular domain of glycosylated mouse TrkB protein produced in CHO cells.                 | IHC, ELISA                  |
| ThermoFisher/Invitrogen | PA5-34026 | Rabbit                                                            | Percent identity with other species by BLAST analysis: Human, Chimpanzee, Gorilla, Orangutan, Gibbon, Monkey, Marmoset, Panda, Horse, Rabbit (100%) Bovine (92%).                         | Synthetic 12 amino acid peptide from cytoplasmic domain of human NTRK2 / TRKB                  | IHC-P                       |
| ThermoFisher/Invitrogen | MA5-14903 | Rabbit                                                            | Human, Mouse, Rat                                                                                                                                                                         | Synthetic peptide surrounding Pro50 of human TrkB                                              | WB                          |
| ThermoFisher/Invitrogen | OST00125W | Rabbit                                                            | Human                                                                                                                                                                                     | Synthetic peptide from extracellular domain of rat TrkB                                        | WB, IHC                     |
| Origene                 | TA500386  | Mouse Clone OTI2E1 (formerly 2E1)                                 | Human                                                                                                                                                                                     | Full-length protein expressed in 293T cell transfected with human NTRK2 expression vector      | WB, IHC, IF                 |
| Origene                 | TA325757  | Rabbit                                                            | Human, Mouse Rat                                                                                                                                                                          | Peptide derived from human Trk B                                                               | WB, IHC                     |

\*Santa Cruz sc-119 only antibody designed with immunogen TrkB.T1 variant (proprietary): picks up WB signal in TrkB.T1<sup>-/-</sup> mice; very recently discontinued by SC with SC providing suggested link for sc-377218 which picks up all variants (ECD designed) as replacement

ELISA: Enzyme-linked immunosorbent assay

F: Flow cytometry

ICC: Immunocytochemistry

IF: Immunofluorescence

IHC: Immunohistochemistry

IHC-P: Immunohistochemistry-Paraffin

IHC-Fr: Immunohistochemistry-Frozen

IP: Immunoprecipitation

WB: Western Blot
