# Supplementary material for: A kinase-deficient NTRK2 splice variant predominates in glioma and amplifies several oncogenic signaling pathways
Source: PubMed Central journal article supplement (PMC7293284; doi:10.1038/s41467-020-16786-5), 2020-06-12
Supplement: 41467_2020_16786_MOESM3_ESM.pdf [file 41467_2020_16786_MOESM3_ESM.pdf]

### **Description of Additional Supplementary Files**

File Name: Supplementary Data 1

Description: TCGA and GTEx Data

File Name: Supplementary Data 2

Description: NTRK Transcripts

File Name: Supplementary Data 3

Description: Mouse Neurospheres and Human GSC Lines

File Name: Supplementary Data 4

Description: Differential Gene Correlation Analysis (DGCA)

File Name: Supplementary Data 5

Description: DE Analysis: GSC Lines (448, 559, G15, G179)

File Name: Supplementary Data 6

Description: DE Analysis: NSC RNA Seq
